# Supplementary material
Source: publisher figshare collection journal article supplement (https://acs.figshare.com/ndownloader/files/4106662)
Supplement: Supplementary file 1 [file 4106662]

## **Supporting Information**

### **Ion Permeation by a Folded Multiblock Amphiphilic Oligomer Achieved by Hierarchical Construction of Self-Assembled Nanopores**

Takahiro Muraoka,<sup>\*,†</sup> Tatsuya Shima,<sup>†</sup> Tsutomu Hamada,<sup>‡</sup> Masamune Morita,<sup>‡</sup>  
Masahiro Takagi,<sup>‡</sup> Kazuhito V. Tabata,<sup>§</sup> Hiroyuki Noji,<sup>§</sup> and Kazushi Kinbara<sup>\*,†</sup>

<sup>†</sup>Institute of Multidisciplinary Research for Advanced Materials, Tohoku University,  
2-1-1, Katahira, Aoba-ku, Sendai 980-8577, Japan.

<sup>‡</sup>School of Materials Science, Japan Advanced Institute of Science and Technology, 1-1,  
Asahidai, Nomi, Ishikawa 923-1292, Japan.

<sup>§</sup>Department of Applied Chemistry, School of Engineering, The University of Tokyo,  
Bunkyo-ku, Tokyo 113-8656, Japan.

#### **Table of Contents**

- 1. Conductance Recordings**
- 2. Time Course Fluorescence Measurements**
- 3. Calculation of Bending Elastic Moduli**
- 4. References**

## 1. Conductance Recordings

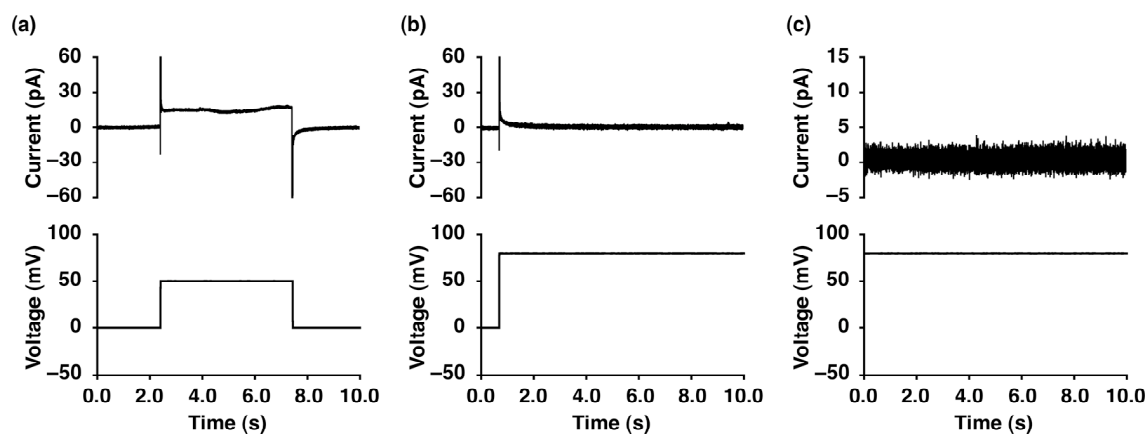

**Figure S1.** Ion channel current recordings of a DOPC liposomal membrane containing **1** ((a) 10 nM) and **2** ((b) 10 nM, (c) 1.0 pM) in HEPES buffer (20 mM, containing 50 mM KCl, pH 7.5) at 20 °C

## 2. Time Course Fluorescence Measurements

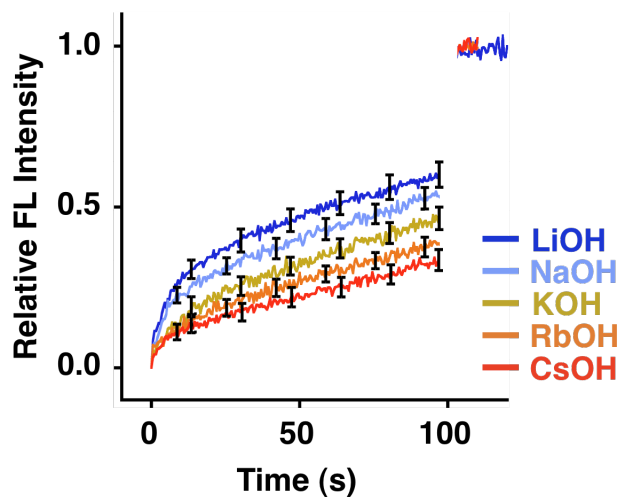

**Figure S2.** Changes in fluorescence intensity of HPTS entrapped in LUVs containing **1** ( $[1]/[\text{DOPC}] = 0.0075$ ) in 20 mM HEPES at 20 °C (excitation at 460 nm, emission at 510 nm) as a function of time after the addition of an alkali metal hydroxide (LiOH, NaOH, KOH, RbOH or CsOH) at 0 sec followed by 1% triton X-100 at 100 sec.  $\Delta\text{pH} = 0.8$  (7.1 to 7.9). Data are means ( $\pm$  standard deviations at every 16 s for clarity) of three independent experiments.

### 3. Calculation of Bending Elastic Modulus<sup>1,2</sup>

Aspiration pressure ( $P$ ) applied to a GUV produces a membrane tension  $\tau$ , which can be described as below,

$$\tau = PD_p/4(1 - D_p/D_{\text{ves}}) \quad (\text{S1})$$

where  $D_p$  and  $D_{\text{ves}}$  are the diameters of pipette caliber and of the GUV spherical segment outside the pipette, respectively. An increase of the aspirated projection length ( $\Delta L_p$ ) of the vesicle membrane inside the pipette provides a direct determination of the area expansion ( $\Delta A$ ) of the aspirated vesicle membrane by a proportional relationship expressed as equation S2 based on a first-order approximation.

$$\Delta A \approx \pi D_p(1 - D_p/D_{\text{ves}})\Delta L_p \quad (\text{S2})$$

Changes in the vesicle membrane area and volume were calculated from  $L_p$  using the geometric relationship for the total membrane area ( $A_{\text{tot}}$ ) and volume ( $V_{\text{tot}}$ ) of the aspirated GUV. Because a pressurized fluid bilayer vesicle is a perfect sphere, the membrane areas and the volumes of the hemispherical cap portion ( $A_{\text{cap}}$  and  $V_{\text{cap}}$ , respectively) and of the cylindrical portion of the projection inside the pipette ( $A_{\text{cyl}}$  and  $V_{\text{cyl}}$ , respectively) can be evaluated by equations S3–S6.

$$A_{\text{cap}} = \pi D_p^2/2 \quad (\text{S3})$$

$$A_{\text{cyl}} = \pi D_p(L_p - D_p/2) \quad (\text{S4})$$

$$V_{\text{cap}} = \pi D_p^3/12 \quad (\text{S5})$$

$$V_{\text{cyl}} = \pi D_p^2(L_p - D_p/2)/4 \quad (\text{S6})$$

The membrane areas and the volumes of the GUV spherical segment outside the pipette ( $A_{\text{ves}}$  and  $V_{\text{ves}}$ , respectively) can be evaluated by equations S7 and S8.

$$A_{\text{ves}} = \pi D_{\text{ves}}^2(1 + u)/2 \quad (\text{S7})$$

$$V_{\text{ves}} = \pi D_{\text{ves}}^3(2 + 3u - u^3)/24 \quad (\text{S8})$$

$$u = [1 - (D_p/D_{\text{ves}})^2]^{1/2} \quad (\text{S9})$$

$A_{\text{tot}}$  and  $V_{\text{tot}}$  were evaluated by equations S10 and S11.

$$A_{\text{tot}} = A_{\text{cap}} + A_{\text{cyl}} + A_{\text{ves}} \quad (\text{S10})$$

$$V_{\text{tot}} = V_{\text{cap}} + V_{\text{cyl}} + V_{\text{ves}} \quad (\text{S11})$$

$D_p$ ,  $D_{\text{ves}}$ , and  $L_p$  were measured at the beginning of each experiment, which were used to calculate the changes in either area (for the volume  $V_{\text{tot}}$  held constant) or volume (for the area  $A_{\text{tot}}$  held constant).

The bending elastic modulus  $B$  is evaluated by the logarithmic dependence of the apparent area expansion on the tension  $\tau$  expressed as below,

$$\log \Delta \tau \approx (8\pi B/k_B T) \Delta A/A_0$$

where  $k_B$  is the Boltzmann constant,  $T$  is the temperature, and  $\Delta A/A_0$  is the area expansion.

#### 4. References

- (1) Olbrich, K. C.; Rawicz, W.; Needham, D.; Evans, E. *Biophys. J.* **2000**, 79, 321–327.
- (2) Rawicz, W.; Olbrich, K. C.; McIntosh, T.; Needham, D.; Evans, E. *Biophys. J.* **2000**, 79, 328–339.
